# Supplementary material
Source: PubMed Central journal article supplement (PMC3442255)
Supplement: NIHMS402032-supplement-Zarate_et_al_2012_SUPPL.pdf [file NIHMS402032-supplement-Zarate_et_al_2012_SUPPL.pdf]

## Relationship of Ketamine's Plasma Metabolites with Response, Diagnosis, and Side Effects in Major Depression

### *Supplemental Information*

**Table S1.** Cytochrome P450 enzymes involved in the metabolism of ketamine and its metabolites.

| Drug / Metabolite                 | Abbreviation | Cytochrome P450 (CYP)<br>Enzymes Involved in Formation<br>of Ketamine Metabolites |
|-----------------------------------|--------------|-----------------------------------------------------------------------------------|
| (R,S) Ketamine                    | Ketamine     |                                                                                   |
| (R,S) Norketamine                 | NK           | CYP2B6, CYP3A, CYP2A6,<br>CYP2C8, CYP2D6, CYP2C9                                  |
| (R,S) Dehydronorketamine          | DHNK         | CYP2B6, CYP2A6, CYP2C8                                                            |
| (2S,6S; 2R,6R)-hydroxynorketamine | HNK4a        |                                                                                   |
| (2S,6R; 2R,6S)-hydroxynorketamine | HNK4b        |                                                                                   |
| (2S,5S; 2R,5R)-hydroxynorketamine | HNK4c        |                                                                                   |
| (2S,4S; 2R,4R)-hydroxynorketamine | HNK4d        | CYP2B6, CYP2A6, CYP3A,<br>CYP2C19, CYP2C8                                         |
| (2S,4R; 2R,4S)-hydroxynorketamine | HNK4e        |                                                                                   |
| (2S,5R; 2R,5S)-hydroxynorketamine | HNK4f        |                                                                                   |
| (2S,6S; 2R,6R)-hydroxyketamine    | HK5a         |                                                                                   |
| (2S,6R; 2R,6S)-hydroxyketamine    | HK5b         | CYP2A6, CYP2C19, CYP3A                                                            |

**Table S2.** List of CYPs, their corresponding alleles, SNP rs ID, phenotypic consequence and assay ID.

| Gene           | Allele  | SNP rs ID               | Nucleotide        | Phenotype | Assay ID <sup>1</sup>                    |
|----------------|---------|-------------------------|-------------------|-----------|------------------------------------------|
| <b>CYP2B6</b>  | 2B6*2   | rs8192709               | 64C>T             | PM        | C__2818162_20                            |
|                | 2B6*4   | rs2279343               | 785A>G            | EM        | PCR-RFLP <sup>2</sup>                    |
|                | 2B6*5   | rs3211371               | 1459C>T           | EM        | C__30634242_40                           |
|                | 2B6*6   | rs2279343,<br>rs3745274 | 785A>G,<br>516G>T | PM        | PCR-RFLP <sup>2</sup> ,<br>C__7817765_60 |
|                | 2B6*9   | rs3745274               | 516G>T            | PM        | C__7817765_60                            |
|                | 2B6*18  | rs28399499              | 983T>C            | PM        | C__60732328_20                           |
| <b>CYP2A6</b>  | 2A6*2   | rs1801272               | 479T>A            | PM        | C__27861808_60                           |
|                | 2A6*9   | rs28399433              | (-)48T>G          | PM        | C__30634332_10                           |
| <b>CYP2C19</b> | 2C19*2  | rs4244285               | 681G>A            | PM        | C__25986767_70                           |
|                | 2C19*3  | rs4986893               | 636G>A            | PM        | C__27861809_10                           |
|                | 2C19*17 | rs12248560              | -806C>T           | UM        | C__469857_10                             |
| <b>CYP3A5</b>  | 3A5*3   | rs776746                | 6986A>G           | PM        | C__26201809_30                           |
|                | 3A5*6   | rs10264272              | 711G>A            | PM        | C__30203950_10                           |
|                | 3A5*7   | rs41303343              | 280312T>TT        | PM        | C__32287188_10                           |

CYP, cytochrome 450; PCR, polymerase chain reaction; SNP, single nucleotide polymorphism.

<sup>1</sup> Genotyping was performed for all the CYPs and their corresponding alleles (except *CYP2B6\*4*) using the predeveloped TaqMan Genotyping Assays (Applied Biosystems, Foster City, CA) following the manufacturer's instructions.

<sup>2</sup> The *CYP2B6\*4* allele was assayed by using PCR restriction length fragment polymorphism (PCR-RFLP) assay using a protocol modified from (1). Briefly, a 1474 bp PCR product for *CYP2B6\*4* was generated using the following primers (IDT DNA, Coraville, IA): forward primer: 5'GTAGTCCTAACATGTCAGCAG and reverse primer: 5' AGAGCCTACAGTGCTCCCA. The PCR was carried out using JumpStart REDAccuTaq LA DNA polymerase (Sigma, St. Louis, MO) in a 16 µl reaction volume containing 30 ng of the genomic DNA. The initial denaturation was at 94°C for 4 min, followed by 35 cycles of denaturation at 94°C for 30s, annealing at 62°C for 30s and extension at 68°C for

2 min. A final extension was performed at 68°C for 10 min. The PCR product (13 µl) was then digested using the restriction enzyme, Sty1 (New England Biolabs Inc., Beverly, MA) and was analyzed by 3% agarose gel electrophoresis. The wildtype *CYP2B6* allele (i.e., nucleotide A) resulted in 56/171/340/907 bp products and the variant allele (i.e., nucleotide G) resulted in 56/340/1078 bp product.

For each of the CYP gene, alleles that did not carry any of the variations. Based on the SNPs present, an individual can be classified as extensive metabolizers (with ‘normal’ enzyme activity; EM), poor metabolizers (reduced or no enzyme activity; PM), or ultra-rapid metabolizers (increased enzyme activity; UM).

**Table S3.** Average plasma concentrations (ng/mL) of ketamine and its major metabolites in the plasma of patients suffering from bipolar depression and major depressive disorder.

|                                  | 40 m            | 80 m          | 110 m         | 230 m         | Day 1         |
|----------------------------------|-----------------|---------------|---------------|---------------|---------------|
| <b>Bipolar Depression</b>        |                 |               |               |               |               |
| Ket                              | 177.23 ± 53.8   | 83.21 ± 28.17 | 60.02 ± 25.01 | 27.63 ± 14.52 | 9.19 ± 10.92  |
| NK                               | 63 ± 24.82      | 69.96 ± 19.98 | 63.35 ± 20.55 | 43.49 ± 16.88 | 14.36 ± 9.27  |
| DHNK                             | 28.07 ± 18.72   | 48.07 ± 26.43 | 50.5 ± 27.44  | 43.08 ± 23.76 | 16.87 ± 13.51 |
| 4a                               | 19.29 ± 7.99    | 29.56 ± 9.44  | 34.9 ± 10.62  | 37.59 ± 14.23 | 21.36 ± 9.39  |
| 4b                               | 15.73 ± 5.74    | 9.09 ± 4.34   | 6.9 ± 3.57    | 4.51 ± 3.08   | BQ            |
| 4c                               | 6.12 ± 4.21     | 8.78 ± 5.27   | 7.96 ± 3.96   | 6.62 ± 3.75   | BQ            |
| 4f                               | 8.06 ± 6.31     | 10.63 ± 5.94  | 10.1 ± 6.14   | 7.38 ± 3.65   | BQ            |
| 5a                               | BQ              | BQ            | BQ            | ND            | ND            |
| 5b                               | ND              | ND            | ND            | ND            | ND            |
| <b>Major Depressive Disorder</b> |                 |               |               |               |               |
| Ket                              | 204.13 ± 101.46 | 93.5 ± 31.06  | 65.03 ± 23.17 | 33.86 ± 19.04 | BQ            |
| NK                               | 55.52 ± 33.87   | 73.54 ± 31.86 | 62.74 ± 26.78 | 46 ± 22.97    | 12.39 ± 8.47  |
| DHNK                             | 7.52 ± 4.8      | 12.02 ± 6.19  | 13.27 ± 6.92  | 10.17 ± 6.65  | BQ            |
| 4a                               | 10.37 ± 6.26    | 18.56 ± 9.25  | 22.18 ± 8.06  | 23.19 ± 11.88 | 10.56 ± 6.76  |
| 4b                               | 12.15 ± 6.56    | 6.12 ± 3.03   | 4.6 ± 2.26    | BQ            | BQ            |
| 4c                               | BQ              | BQ            | BQ            | BQ            | BQ            |
| 4f                               | 4.38 ± 5.82     | 6.96 ± 7.29   | 6.57 ± 7.09   | 4.3 ± 5.09    | BQ            |
| 5a                               | 8.11 ± 4.99     | 9.24 ± 5.63   | 8.62 ± 5.94   | 6.64 ± 6.32   | BQ            |
| 5b                               | ND              | ND            | ND            | ND            | ND            |

BQ, below quantitation; DHNK, dehydronorketamine; Ket, ketamine; ND, not detectable; NK, norketamine.

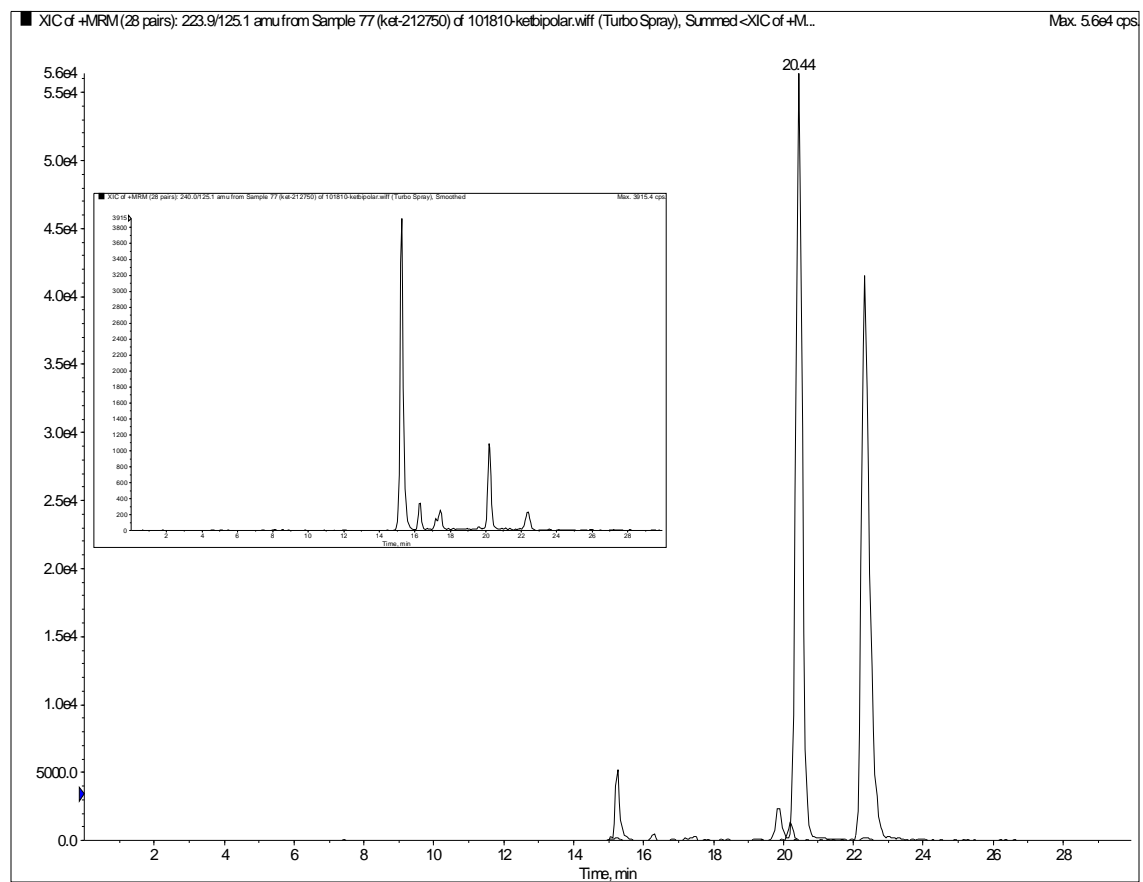

**Figure S1.** A representative chromatogram of ketamine and its major metabolites in the plasma samples obtained from patients with bipolar depression.

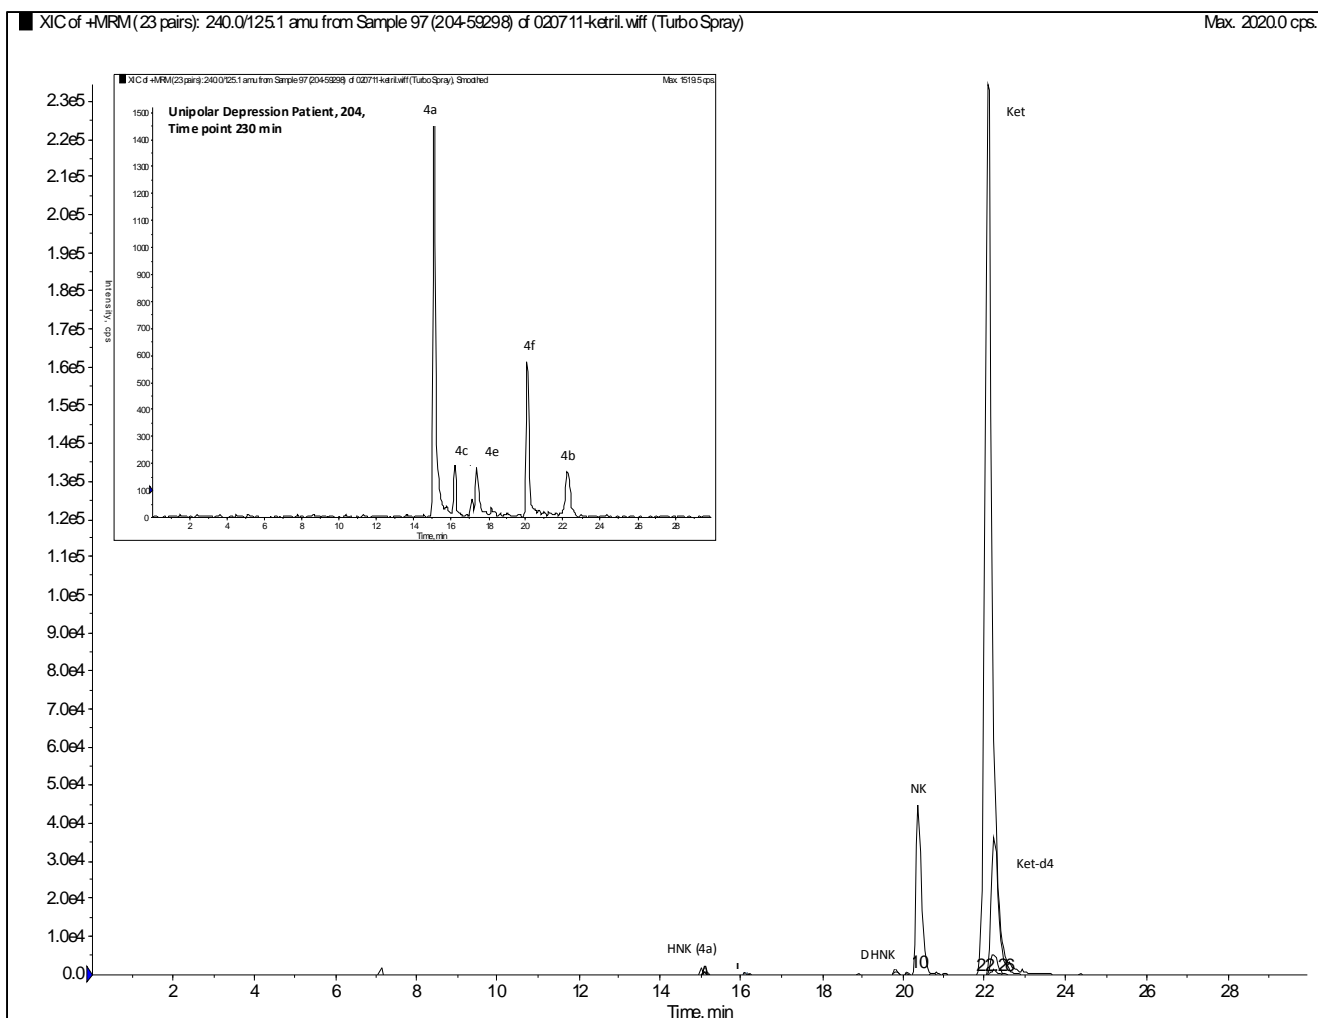

**Figure S2.** A representative chromatogram of ketamine and its major metabolites in the plasma samples obtained from patients with major depressive disorder.

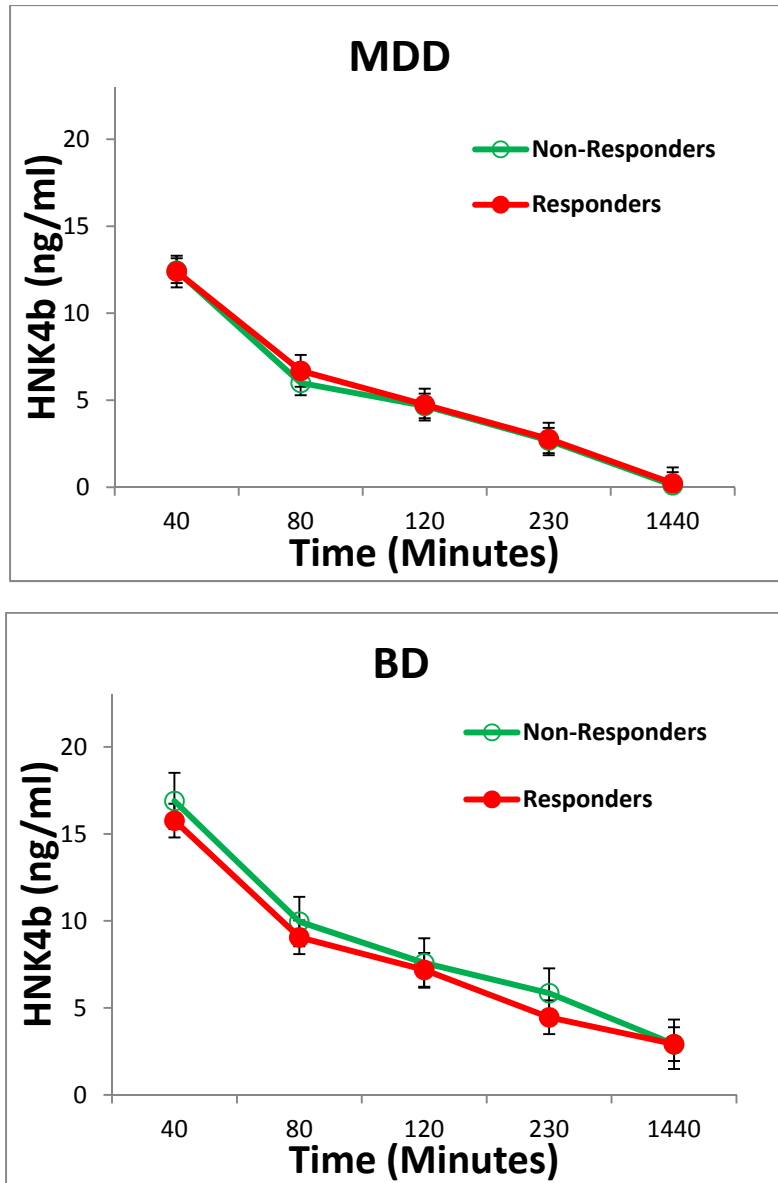

**Figure S3.** HNK4b plasma concentrations by response and diagnosis in patients with treatment-resistant depression. HNK4b plasma concentrations were significantly higher in patients with BD than MDD. BD, bipolar depression; MDD, major depressive disorder.

## Supplemental References

1. Jacob RM, Johnstone EC, Neville MJ, Walton RT (2004): Identification of CYP2B6 sequence variants by use of multiplex PCR with allele-specific genotyping. *Clin Chem* 50:1372-1377.
